# Supplementary material
Source: PubMed Central journal article supplement (PMC2492484)
Supplement: 0804895105_0804895105SI.pdf [file 0804895105_0804895105SI.pdf]

# Supporting Information

Zhang et al. 10.1073/pnas.0804895105

## A Gated c-Kit<sup>+</sup>Gr-1<sup>+</sup> BM cells

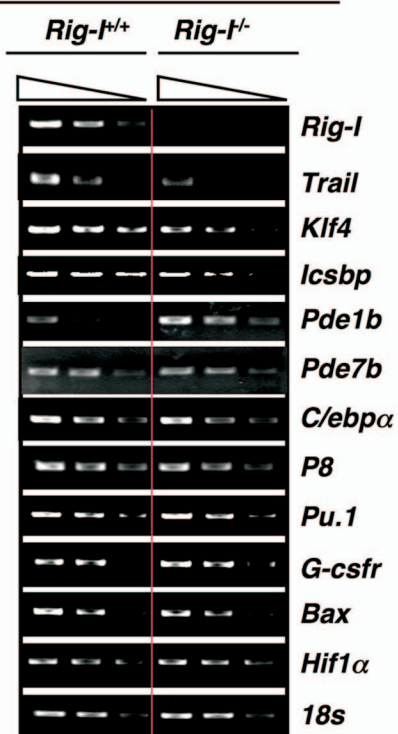

## B

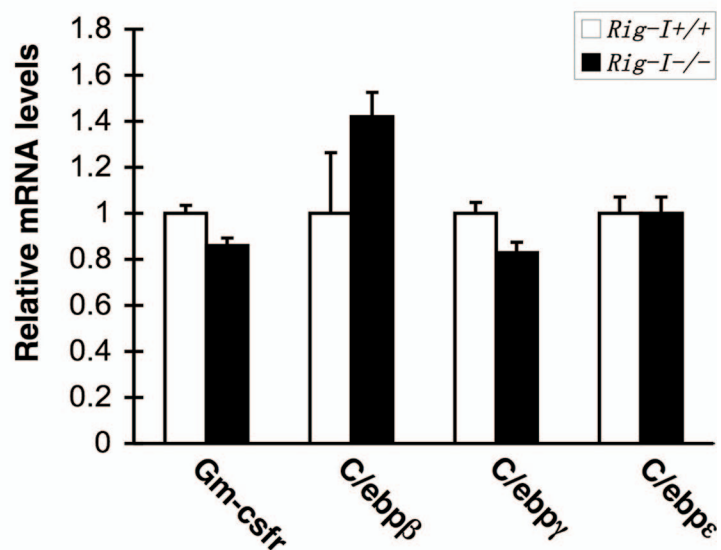

**Fig. S1.** The expression profile of *Rig-I*<sup>-/-</sup> granulocytes. The total RNA samples were isolated from pooled mature granulocytes of either *Rig-I*<sup>+/+</sup> or *Rig-I*<sup>-/-</sup> mice ( $n = 3$ ). (A) Three serially diluted RNA samples were simultaneously used as template inputs of PCRs at a given cycling number. (B) The real-time PCR measurement on the expression levels of indicated mRNAs.
